# Supplementary material for: Effects of bilayer phases on phospholipid-poloxamer interactions
Source: Royal Society of Chemistry journal article supplement (doi:10.1039/b813354a), 2009-01-01
Supplement: b813354a.pdf [file b813354a.pdf]

Supporting Information for

Effects of Bilayer Phases on Phospholipid-  
Poloxamer Interactions

*Guohui Wu,<sup>†</sup> Htet A. Khant,<sup>‡</sup> Wah Chiu,<sup>‡</sup> and Ka Yee C. Lee<sup>\*,†</sup>*

\*To whom correspondence should be addressed. E-mail: [kayeelee@uchicago.edu](mailto:kayeelee@uchicago.edu)

## SUPPORTING FIGURES AND LEGENDS

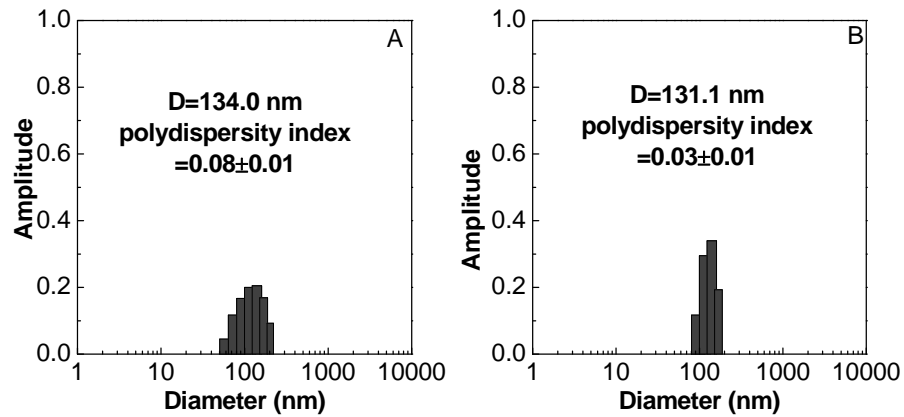

**FIGURE S1.** Particle size distribution determined from DLS for liposomes stored above 24 °C of (A) DMPC; (B) DMPC/poloxamer (poloxamer content 7.3 mg/ml).

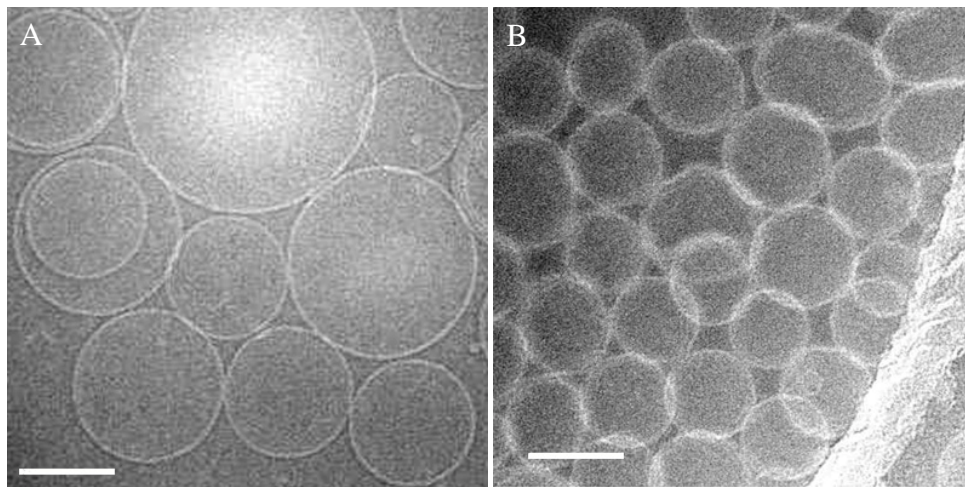

**FIGURE S2.** Cryo-EM micrographs of (A) POPC (10 mg/ml) and (B) POPC/P338 (10/10 mg/ml) liposomes. The vesicles are more monodisperse with the presence of P338. Scale bar = 100 nm.
